# Supplementary material for: LSC17 score complements genetics and measurable residual disease in acute myeloid leukemia: an ALFA study
Source: PubMed Central journal article supplement — Blood Adv. 2023 May 23;7(15):4024–34. doi: 10.1182/bloodadvances.2023010155 (PMC10410128; doi:10.1182/bloodadvances.2023010155), 2023-05-23
Supplement: BLOODA_ADV-2023-010155-mmc1.pdf [file BLOODA_ADV-2023-010155-mmc1.pdf]

**LSC17 score complements genetics and measurable residual disease in acute myeloid leukemia: an ALFA study.**

L. Vasseur et al.

**Supplementary Appendix**

**Supplementary Figures 1-2: pages 2-3**

**Supplementary Tables 1-5: pages 4-6**

**Supplementary Figure 1. Study Flow Chart.** Study population according to the availability of the LSC17 score at diagnosis, NGS gene panel at diagnosis, and *NPM1*-MRD data in the total ALFA 0702 population.

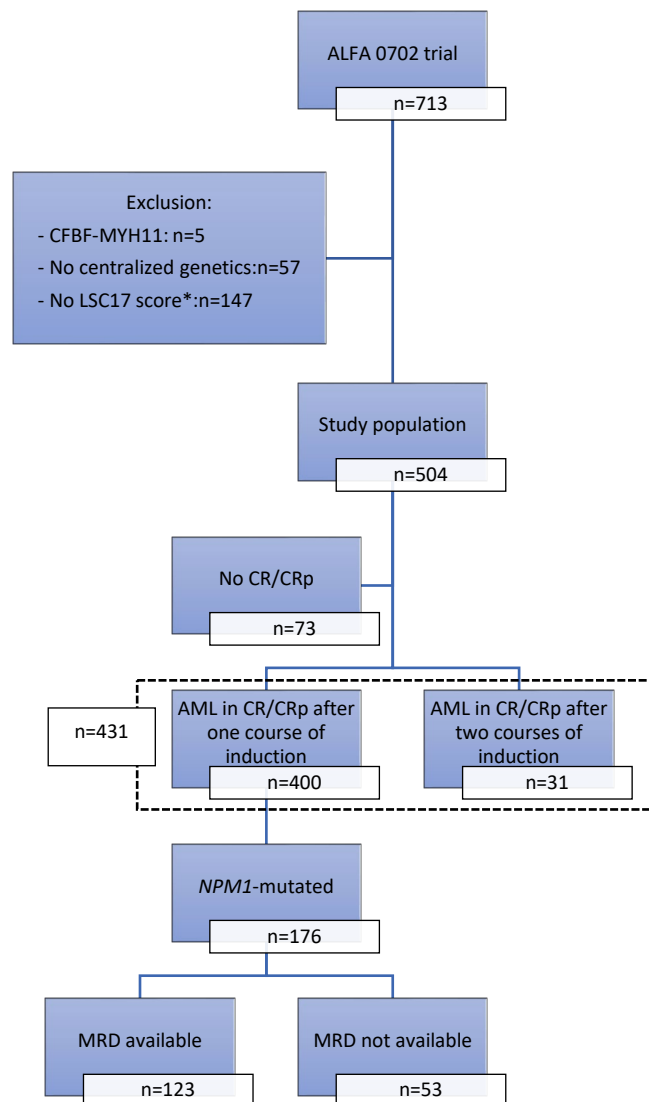

\*LSC17 score was not performed due to the lack of sufficient material to extract RNA and to perform Nanostring assay.

**Supplementary Figure 2. Forest plot of LSC17 status impact on OS and DFS according**

**to baseline characteristics.** In each subgroup, according to LSC17 status, number of patients with an event, total patients at risk and percentage are represented with hazard ratios with confidence intervals and p-value of the interaction term for **A. Overall** and **B. Disease-Free Survival**.

**A**

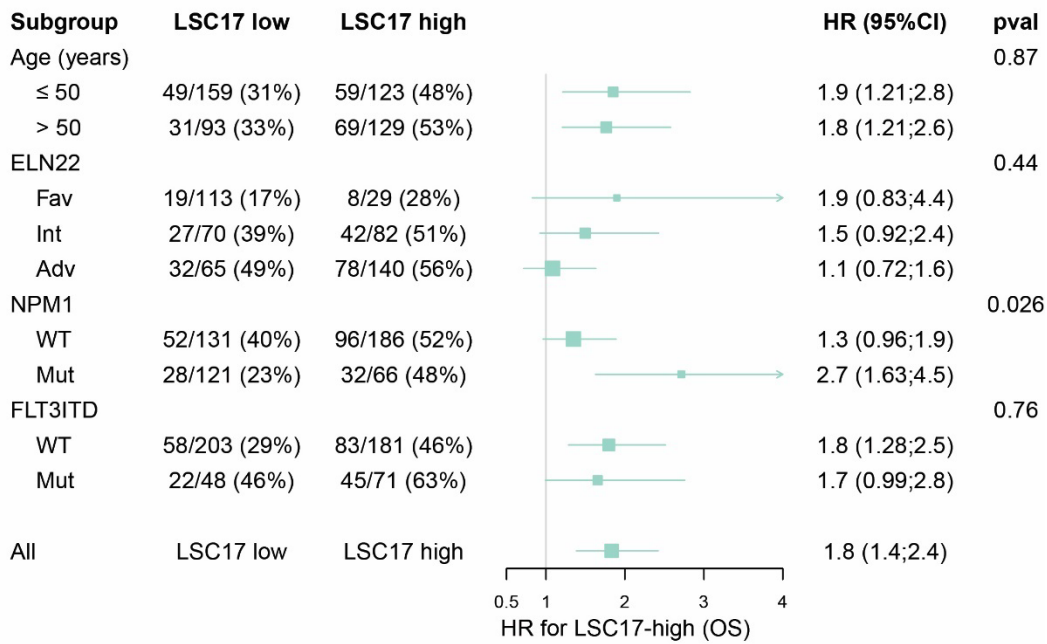

**B**

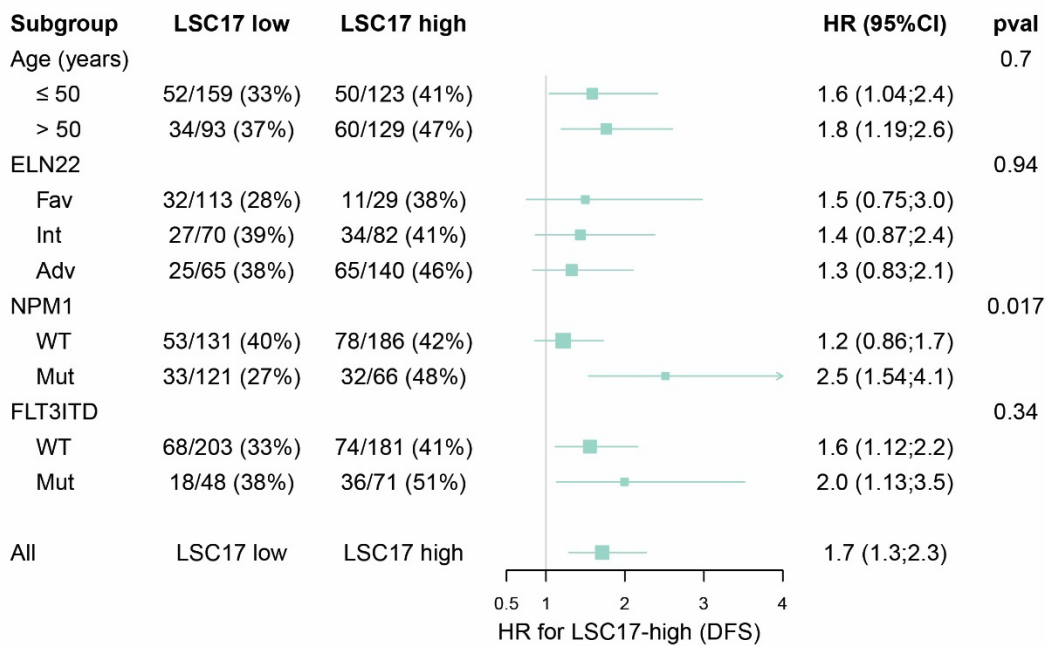

**Supplementary Table 1. Risk Stratification in the ALFA-0702 Trial and protocol-defined Transplantation indications**

| Protocol-defined risk | Characteristics*                                                                                                                                                                                                    | HSCT indication |
|-----------------------|---------------------------------------------------------------------------------------------------------------------------------------------------------------------------------------------------------------------|-----------------|
| Favorable             | Normal karyotype if <i>NPM1</i> or <i>CEBPA</i> mutation** but without <i>FLT3-ITD</i> ***                                                                                                                          | No              |
| Intermediate          | All other cases                                                                                                                                                                                                     | Yes             |
| Unfavorable           | -5, -7, 5q-, 7q-<br>11q23 or <i>MLL</i> + including <i>MLL</i> -PTD (except 9;11)<br>t(6;9)<br>Complex karyotype (≥ 3 abnormalities)<br>3q26 abnormalities or <i>EVI-1</i> + by RT-qPCR<br>> 1 course to achieve CR | Yes             |

\*based on local cytogenetics and genetics

\*\*mono-allelic or bi-allelic mutation

\*\*\*regardless of allelic ratio

**Supplementary Table 2. Multivariable analysis of Cumulative Incidence of Relapse and Non-relapse Mortality.** SHR Standardized Hazard Ratio. P-values from Fine and Gray model for competing events.

|                         | Cumulative Incidence of Relapse |         | Non-relapse Mortality |         |
|-------------------------|---------------------------------|---------|-----------------------|---------|
|                         | SHR (95% CI)                    | p-value | SHR (95% CI)          | p-value |
| <i>LSC17 status</i>     |                                 |         |                       |         |
| LSC17-low               | 1                               |         | 1                     |         |
| LSC17-high              | 1.47 (1.03-2.09)                | 0.034   | 1.00 (0.50-2.01)      | 0.99    |
| Age (per 10 years)      | 1.19 (1.02-1.40)                | 0.029   | 1.08 (0.84-1.40)      | 0.54    |
| Log <sub>10</sub> (WBC) | 1.44 (1.10-1.88)                | 0.009   | 0.93 (0.57-1.51)      | 0.76    |
| <i>ELN 2022 risk</i>    |                                 |         |                       |         |
| Favorable               | 1                               |         | 1                     |         |
| Intermediate            | 1.54 (0.97-2.42)                | 0.066   | 2.08 (0.83-5.20)      | 0.12    |
| Adverse                 | 1.89 (1.21-2.95)                | 0.005   | 2.53 (0.93-6.87)      | 0.07    |

**Supplementary Table 3. Logistic regression on *NPM1* MRD level after the first course of induction chemotherapy.**

|                              | <b>OR (95% CI)</b> | <b>p-value</b> |
|------------------------------|--------------------|----------------|
| <i><b>LSC17 status</b></i>   |                    |                |
| <b>LSC17-low</b>             | 1                  |                |
| <b>LSC17-high</b>            | 1.03 (0.42-2.48)   | 0.95           |
| <b>Age (per 10 years)</b>    | 0.97 (0.64-1.52)   | 0.90           |
| <b>Log<sub>10</sub>(WBC)</b> | 1.78 (0.87-3.77)   | 0.12           |
| <i><b>ELN 2022 risk</b></i>  |                    |                |
| <b>Favorable</b>             | 1                  |                |
| <b>Intermediate</b>          | 1.08 (0.42-2.70)   | 0.86           |
| <b>Adverse</b>               | 1.42 (0.25-6.86)   | 0.67           |

**Supplementary Table 4. Multivariable analysis of the prognostic impact of LSC17 score on DFS and OS from CR/CRp in patients with an available *NPM1* MRD1 result.**

|                         | DFS              |               | OS from CR/CRp   |              |
|-------------------------|------------------|---------------|------------------|--------------|
|                         | HR (95% CI)      | p-value       | HR (95% CI)      | p-value      |
| <i>LSC17 status</i>     |                  |               |                  |              |
| LSC17-low               | 1                |               | 1                |              |
| LSC17-high              | 2.34 (1.23-4.48) | <b>0.010</b>  | 2.31 (1.09-4.91) | <b>0.029</b> |
| Age (per 10 years)      | 1.17 (0.80-1.71) | 0.41          | 1.44 (0.92-2.25) | 0.11         |
| Log <sub>10</sub> (WBC) | 1.04 (0.60-1.81) | 0.88          | 1.47 (0.77-2.81) | 0.24         |
| <i>ELN 2022 risk</i>    |                  |               |                  |              |
| Favorable               | 1                |               | 1                |              |
| Intermediate            | 1.18 (0.59-2.36) | 0.64          | 2.02 (0.92-4.46) | 0.08         |
| Adverse                 | 1.77 (0.59-5.32) | 0.31          | 2.58 (0.79-8.38) | 0.11         |
| <i>NPM1 MRD</i>         |                  |               |                  |              |
| Negative                | 1                |               | 1                |              |
| Positive                | 3.36 (1.81-6.24) | <b>0.0001</b> | 2.66 (1.29-5.48) | <b>0.008</b> |

**Supplementary Table 5. Discrimination performances of LSC17 status, MRD, ELN22, and the combination of LSC17 and MRD in patients with an available *NPM1*-MRD1 result.**

| ROC-AUC              | 3-year OS from CR            | 3-year DFS                   | 3-year CIR                   |
|----------------------|------------------------------|------------------------------|------------------------------|
| <b>LSC17</b>         | 0.717<br>(95%CI:0.618-0.816) | 0.664<br>(95%CI:0.574-0.754) | 0.634<br>(95%CI:0.539-0.73)  |
| <b>MRD</b>           | 0.659<br>(95%CI:0.558-0.761) | 0.679<br>(95%CI:0.591-0.768) | 0.708<br>(95%CI:0.616-0.801) |
| <b>ELN22</b>         | 0.671<br>(95%CI:0.566-0.777) | 0.552<br>(95%CI:0.454-0.651) | 0.539<br>(95%CI:0.437-0.641) |
| <b>LSC17 and MRD</b> | 0.800<br>(95%CI:0.708-0.892) | 0.766<br>(95%CI:0.677-0.855) | 0.777<br>(95%CI:0.684-0.869) |
